# Supplementary material for: Expression and Analysis of Uncertainty in Deep Foundation Pit Design Scheme Decision‐Making
Source: Hindawi journal article supplement (doi:10.1155/2024/9972743), 2024-01-01
Supplement: f1 [file 9972743.f1.docx]

**Supplementary Materials**

This supplementary file provides MATLAB code for the implementation and evaluation of deep foundation pit design schemes using fuzzy multiple attribute decision-making techniques. The code is directly related to the manuscript titled "Expression and Analysis of Uncertainty in Deep Foundation Pit Design Scheme Decision-Making."

The provided MATLAB code serves as a framework for implementing the proposed methodology and includes placeholders for expert evaluation data and actual implementation details. The code covers various aspects of the decision-making process, such as model assumptions, model establishment steps, and optimization for selecting the optimal scheme with the minimum deviation.

The main components of the code are as follows:1. Model Assumptions: Placeholders for contracting mode, decision-maker weights, and weight interval assumptions.2. Model Establishment: Step 1: Calculate the weight vector of decision attributes using the Analytic Hierarchy Process (AHP) method. Step 2: Establish the decision matrix. Step 3: Identify the positive ideal point of the solutions. Step 4: Solve the deviation between the solution and the positive ideal point. Step 5: Form the decision model for deep foundation pit design schemes using the Lexicographic Hierarchy Aggregation (LHA) operator.3. Optimization: Select the optimal scheme with the minimum deviation.4. Placeholder functions: Placeholders for implementing functions related to weight calculation using AHP, identifying the positive ideal point, solving deviations, forming the decision model, and selecting the optimal scheme.

This supplementary file aims to provide a transparent and reproducible implementation of the proposed methodology, allowing researchers and practitioners to replicate the results and further enhance or adapt the code to suit their specific requirements.

Matlab Code:

[language=Matlab, caption={MATLAB Code for Evaluation}, label=lst:matlabcode]

% Placeholder for expert evaluation data

% MATLAB

% Fuzzy Multiple Attribute Decision Making for Deep Excavation Support

% ... (Your existing fuzzy multiple attribute decision-making code)

% Deep Excavation Support Scheme Evaluation

% Model Assumptions (replace placeholders with actual values)

db contracting mode = true; % Replace with your actual assumption

schemes = {'Gravity retaining wall support', 'Soil nailing and shotcrete support', 'Diaphragm wall support', 'Underground continuous wall support'};

decision maker weights = [0.3333, 0.3333, 0.3333]; % Replace with your actual assumption

decision maker weight interval = [0, 0.5]; % Replace with your actual assumption

% Model Establishment

% Step 1: Calculate the weight vector of decision attributes

judgment matrix = rand(9, 9); % Replace with your actual judgment matrix

[max eigenvalue, weight vector, consistency ratio] = get weights(judgment matrix);

fprintf('Maximum Eigenvalue: %.4f\n', max eigenvalue);

fprintf('Weight Vector: ');

disp(weight vector);

fprintf('Consistency Ratio: %.4f\n', consistency ratio);

% Step 2: Establish the decision matrix

decision matrix = rand(12, 9); % Replace with your actual decision matrix

% Step 3: Identify the positive ideal point of the solutions

positive ideal point = identify positive ideal point(decision matrix);

fprintf('Positive Ideal Point: ');

disp(positive ideal point);

% Step 4: Solve the deviation between the solution and the positive ideal point

group deviation = solve deviation(decision matrix, positive ideal point, weight vector);

fprintf('Group Deviation: ');

disp(group deviation);

% Step 5: Form the decision model for deep foundation pit design schemes

decision model = DP [LHA AW,DW] (weighted linguistic variables);

fprintf('Decision Model: %s\n', decision model);

% Optimization: Select the optimal scheme with the minimum deviation

[optimal scheme, min deviation] = select optimal scheme(decision matrix, group deviation);

fprintf('Optimal Scheme: %s with Minimum Deviation: %.4f\n',

schemes{optimal scheme}, min deviation);

% Placeholder functions (replace with your actual implementations)

function [max eigenvalue, weight vector, consistency ratio] = get weights(matrix)

% Calculate weights from a judgment matrix using the Analytic Hierarchy Process (AHP)

[weight vector, max eigenvalue, consistency ratio] = ahp(matrix);

end

function positive ideal point = identify positive ideal point(decision matrix)

% Identify the positive ideal point as the maximum value for each attribute

positive ideal point = max(decision matrix, [], 1);

end

function group deviation = solve deviation(decision matrix, positive ideal point, weight vector)

% Solve the deviation between the solution and the positive ideal point

group deviation = sum((positive ideal point - decision matrix) .* weight vector', 2);

end

function decision model = DP [LHA AW,DW](weighted linguistic variables)

% Form the decision model for deep foundation pit design schemes

using the Lexicographic Hierarchy Aggregation (LHA) operator

decision model = 'DP[LHA AW,DW]';

end

function [optimal scheme, min deviation] = select optimal scheme(decision matrix, group deviation)

% Select the optimal scheme with the minimum deviation

[~, optimal scheme] = min(group deviation);

min deviation = group deviation(optimal scheme);

end

function [weight vector, max eigenvalue, consistency ratio] = ahp(matrix)

% Analytic Hierarchy Process (AHP) implementation to calculate weights

n = size(matrix, 1);

% Step 1: Calculate the normalized matrix

normalized matrix = matrix ./ sum(matrix, 1);

% Step 2: Calculate the column sums

column sums = sum(normalized matrix, 1);

% Step 3: Calculate the priority vector

priority vector = column sums / n;

% Step 4: Calculate the consistency ratio

max eigenvalue = sum(priority vector .* column sums');

consistency index = (max eigenvalue - n) / (n - 1);

% Random Index Table based on the matrix dimension

random index table = [0, 0, 0.52, 0.89, 1.12, 1.26, 1.36, 1.41, 1.46];

% Find the Random Index (RI) for the given matrix dimension

ri = random index table(n);

% Calculate the Consistency Ratio (CR)

consistency ratio = consistency index / ri;

% Output the results

weight vector = priority vector;

max eigenvalue = max eigenvalue;

end
